# Supplementary material for: Wireless Intracortical Visual Prosthesis (ICVP) without intracranial cabling: Feasibility study results after 3 years
Source: Research Square preprint supplement (doi:10.21203/rs.3.rs-8355958/v1), 2026-01-29
Supplement: Supplementary file 1 [file 7cdbae622f119a884968acb3.docx]

- Supplementary Video 1.mov
  - Title: Supplementary Video 1
  - Legend: Visual input from Participant 1’s glasses-mounted camera is shown (left) beside a simplified phosphene depiction (right) as Participant 1 scanned horizontal and vertical 1.5 cpd gratings. Portions of the camera view that were not bright enough to elicit stimulation were darkened in this display, as seen along the bottom of the gratings. Regions of interest controlling electrode stimulation, when active and triggering phosphenes, are shown as small circles overlaid on the camera video. Aliasing appeared in the downscaled rendering of the camera video but did not affect processing for phosphene generation. Participant 1 correctly reported orientations for the trials shown.
- Supplementary Video 2.mov
  - Title: Supplementary Video 2
  - Legend: Visual input from Participant 1’s glasses-mounted camera is shown (left) beside a simplified phosphene depiction (right) as Participant 1 scanned horizontal and vertical 2.4 cpd gratings. Portions of the camera view that were not bright enough to elicit stimulation were darkened in this display, as seen along the bottom of the gratings. Regions of interest controlling electrode stimulation, when active and triggering phosphenes, are shown as small circles overlaid on the camera video. Aliasing appeared in the downscaled rendering of the camera video but did not affect processing for phosphene generation. Participant 1 correctly reported orientations for the trials shown.
